# Supplementary material for: High-performance flexible photodetectors based on single-crystalline Sb2Se3 nanowires
Source: Royal Society of Chemistry journal article supplement (doi:10.1039/c5ra23542a), 2016-01-01
Supplement: c5ra23542a1.pdf [file c5ra23542a1.pdf]

## Supporting information

### High-performance flexible photodetectors based on single-crystalline $\text{Sb}_2\text{Se}_3$ nanowires

Yao Liang,<sup>\*a</sup> Yingying Wang,<sup>b</sup> Jianan Wang,<sup>a</sup> Sumei Wu,<sup>a</sup> Dayong Jiang<sup>\*c</sup> and  
Jiabiao Lian<sup>\*d</sup>

<sup>a</sup>*School of Materials Science and Engineering, Dalian Jiaotong University, Dalian 116028, P. R. China. E-mail: yliang0625@hotmail.com*

<sup>b</sup>*Department of Optoelectronic Science, Harbin Institute of Technology at Weihai, Weihai 264209, P. R. China.*

<sup>c</sup>*School of Materials Science and Engineering, Changchun University of Science and Technology, Changchun 130022, P. R. China. E-mail: dayongjiangcust@126.com*

<sup>d</sup>*School of Civil and Environmental Engineering, College of Engineering, Nanyang Technological University, Singapore 639798. E-mail: jblian@ntu.edu.sg*

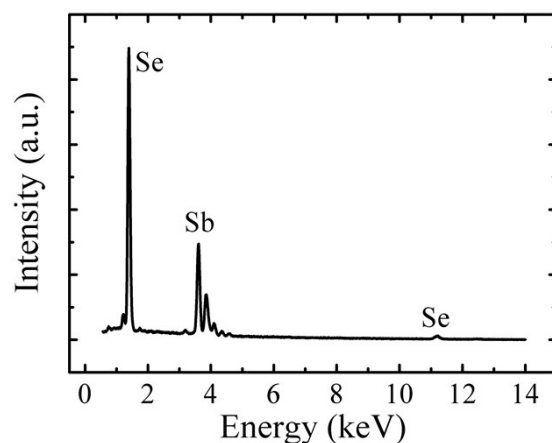

Fig. S1 EDX spectrum of the synthesized product. The product includes elements Sb (40.5 %) and Se (59.5 %). The atomic ratio of Sb and Se is close to the stoichiometry of  $\text{Sb}_2\text{Se}_3$ .

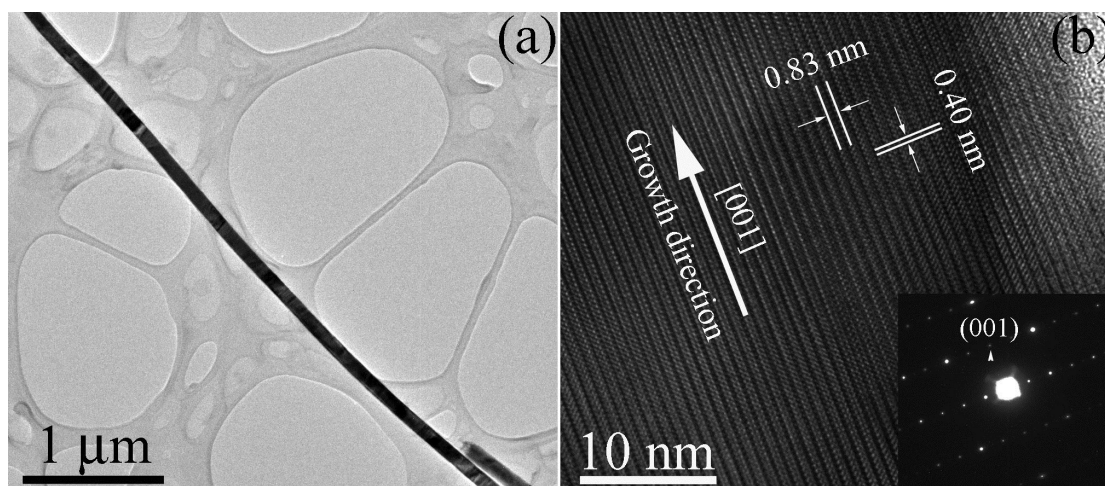

Fig. S2 (a) TEM image of a typical  $\text{Sb}_2\text{Se}_3$  nanowire. (b) HRTEM image taken from the nanowire in (a). Inset is the corresponding selected area electron diffraction (SAED) pattern. The lattice fringes with an interplanar spacing of 0.40 nm correspond to the (001) plane of orthorhombic  $\text{Sb}_2\text{Se}_3$ . The results confirm that the synthesized nanowires are single-crystalline and grow along the [001] direction.

**To calculate  $R_\lambda$  and  $EQE$**

Under the illumination of  $13 \mu\text{W}/\text{cm}^2$  635 nm light, the photocurrent ( $I_{ph}$ ) is 40 pA at a bias of 10 V. As shown in the inset of the Fig. 2, the diameter of the nanowire is 135 nm. The length of the nanowire between two electrodes is 6.4  $\mu\text{m}$ . Thus, the effective illuminated area ( $S$ ) is  $1.35 \times 10^{-5} \times 6.4 \times 10^{-4} \text{ cm}^2$ . The power density ( $P$ ) and wavelength ( $\lambda$ ) of the incident light are  $13 \mu\text{W}/\text{cm}^2$  and 635 nm, respectively. Planck's constant ( $h$ ) is  $6.626 \times 10^{-34} \text{ J}\cdot\text{s}$ , the electronic charge ( $e$ ) is  $1.602 \times 10^{-19} \text{ C}$ , the speed of light ( $c$ ) is  $2.998 \times 10^8 \text{ m/s}$ .

$$R_\lambda = \frac{I_{ph}}{PS} = \frac{4.0 \times 10^{-11}}{1.3 \times 10^{-5} \times 1.35 \times 10^{-5} \times 6.4 \times 10^{-4}} \text{ A/W} \approx 360 \text{ A/W}$$

$$EQE = \frac{hcR_\lambda}{e\lambda} = \frac{6.626 \times 10^{-34} \times 2.998 \times 10^8 \times 360}{1.602 \times 10^{-19} \times 6.35 \times 10^{-7}} \approx 7.0 \times 10^4 \%$$

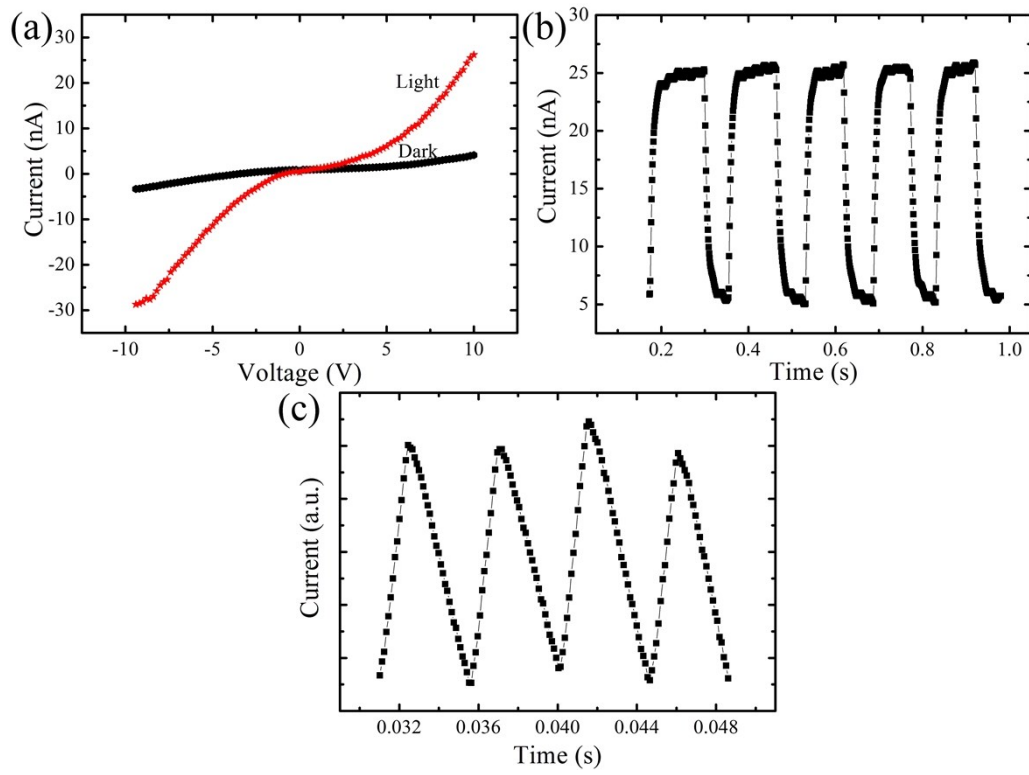

Fig. S3 (a)  $I$ - $V$  curves of a multiple  $\text{Sb}_2\text{Se}_3$  nanowires based photodetector (DS1) in the dark and under the illumination of 635 nm light. (b,c) Time responses of DS1 measured at a bias of 10 V under the illumination of chopped 635 nm light. From (b), it can be deduced that DS1 can detect 635 nm light repeatedly and its rise/fall time is 13/20 ms. (c)  $I$ - $t$  curve shows that the photodetector has ability to detect 635 nm light with an on-off frequency up to 230 Hz.

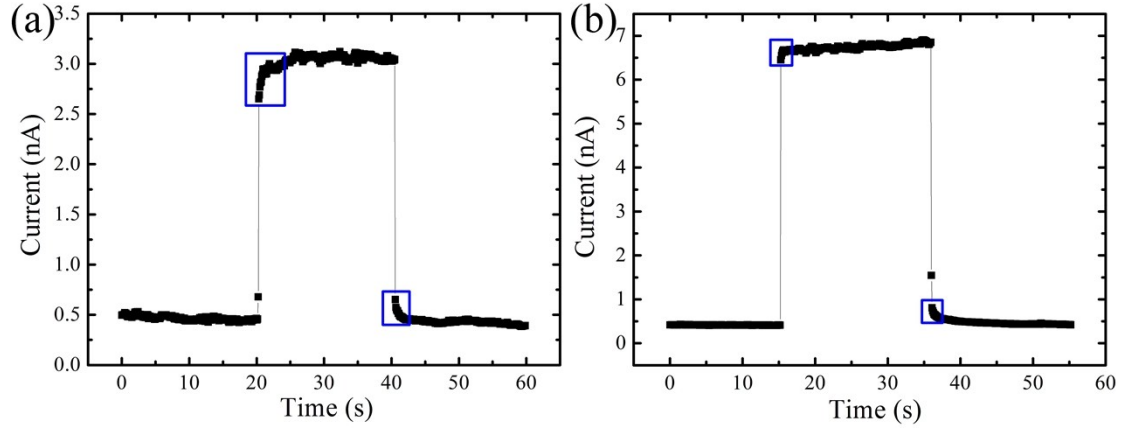

Fig. S4 (a) Time response of a multiple  $\text{Sb}_2\text{Se}_3$  nanowires based photodetector (DS2) to  $65 \text{ mW/cm}^2$  635 nm light at a bias of 10 V. (b) Time response of another multiple  $\text{Sb}_2\text{Se}_3$  nanowires based photodetector (DS3) to  $67 \text{ mW/cm}^2$  635 nm light at 10 V. It is obvious that the number of nanowires in the DS3 is more than that in the DS2. For the DS2, there are a longer rise tail and an obvious fall tail marked by two blue rectangles, as shown in (a). Thus, the response speed of the DS2 is slower than that of the DS3. As the power densities of incident 635 nm light, the applied voltages and photodetector's configurations are similar, the difference of response speed between the DS2 and the DS3 is related to the number of nanowires in photodetectors. It can be concluded that increasing the number of nanowires in the photodetector can improve response speed.

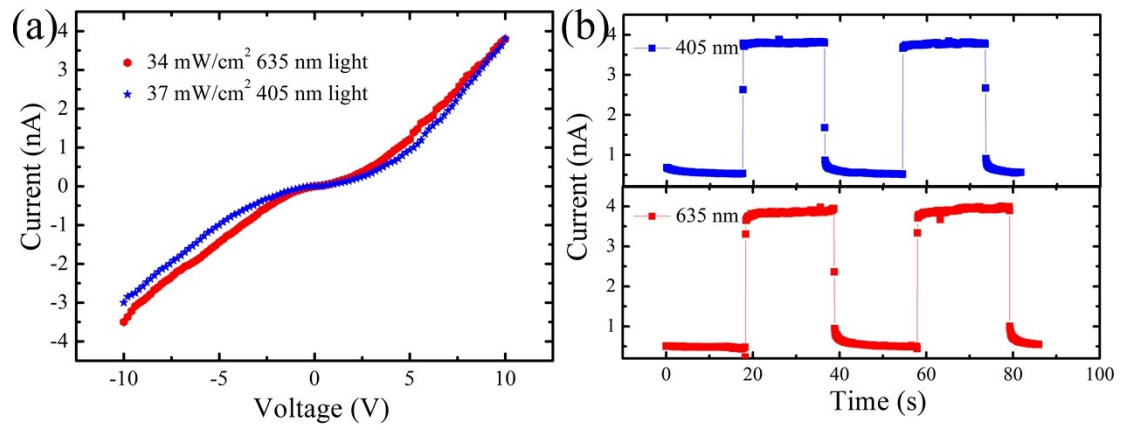

Fig. S5 (a) *I-V* curves of the DS3 under the illuminations of 34 mW/cm<sup>2</sup> 635 nm light and 37 mW/cm<sup>2</sup> 405 nm light. (b) The time responses of the DS3 to 405 nm light and 635 nm light, respectively. (a) and (b) indicate that the response of the DS3 to 405 nm light is similar to that to 635 nm light.
